# Supplementary material for: Hormonal and reproductive factors in relation to the risk of rheumatoid arthritis in women: a prospective cohort study with 223 526 participants
Source: PubMed Central journal article supplement — RMD Open. 2024 Jan 9;10(1):e003338. doi: 10.1136/rmdopen-2023-003338 (PMC10826586; doi:10.1136/rmdopen-2023-003338), 2024-01-09
Supplement: rmdopen-2023-003338supp001.pdf [file rmdopen-2023-003338supp001.pdf]

**Supplementary Table 1 Questions on variables related to hormonal and reproductive factors.**

| Variable                                                    | Original question                                                            | Field ID |
|-------------------------------------------------------------|------------------------------------------------------------------------------|----------|
| Age at menarche                                             | How old were you when your periods started?                                  | 2714     |
| Number of live births                                       | How many children have you given birth to? (Please include live births only) | 2734     |
| Ever had stillbirth, spontaneous miscarriage or termination | Have you ever had any stillbirths, spontaneous miscarriages or terminations? | 2774     |
| Had menopause                                               | Have you had your menopause (periods stopped)                                | 2724     |
| Age at menopause                                            | How old were you when your periods stopped?                                  | 3581     |
| Ever had hysterectomy                                       | Have you had a hysterectomy (womb removed)?                                  | 3591     |
| Bilateral oophorectomy                                      | Have you had both ovaries removed                                            | 2834     |
| Ever taken oral contraceptive pill                          | Have you ever taken the contraceptive pill? (include the 'mini-pill')        | 2784     |
| Age started oral contraceptive pill                         | About how old were you when you first went on the contraceptive pill?        | 2794     |
| Age when last used oral contraceptive pill                  | How old were you when you last used the contraceptive pill?                  | 2804     |
| Ever used hormone-replacement therapy (HRT)                 | Have you ever used hormone replacement therapy (HRT)?                        | 2814     |
| Age started hormone-replacement therapy (HRT)               | How old were you when you first used HRT?                                    | 3536     |
| Age last used hormone-replacement therapy (HRT)             | How old were you when you last used HRT?                                     | 3546     |

**Supplementary Table 2 Hazard ratios for comparing individual and combined associations between hormonal and reproductive factors and the risk of rheumatoid arthritis.**

| Characteristics                           | Total population<br>(n=190574) | Number Incidence cases<br>(n=2622) | Model 1          |                   | Model 2          |                   | Model 3          |                   |
|-------------------------------------------|--------------------------------|------------------------------------|------------------|-------------------|------------------|-------------------|------------------|-------------------|
|                                           |                                |                                    | HR (95%CI)       | P Value           | HR (95%CI)       | P Value           | HR (95%CI)       | P Value           |
| <b>Age at menarche, years</b>             |                                |                                    |                  |                   |                  |                   |                  |                   |
| <12                                       | 36640                          | 558                                | 1.15(1.02, 1.28) | <b>0.020</b>      | 1.05(0.94, 1.18) | 0.385             | 1.04(0.92, 1.16) | 0.555             |
| 12                                        | 36214                          | 460                                | 0.97(0.86, 1.09) | 0.587             | 0.94(0.84, 1.06) | 0.339             | 0.94(0.83, 1.06) | 0.310             |
| 13                                        | 47690                          | 619                                | Reference        |                   | Reference        |                   | Reference        |                   |
| 14                                        | 38168                          | 503                                | 0.99(0.88, 1.11) | 0.830             | 0.98(0.87, 1.11) | 0.774             | 0.98(0.87, 1.11) | 0.771             |
| >14                                       | 31862                          | 482                                | 1.15(1.02, 1.29) | <b>0.023</b>      | 1.11(0.99, 1.25) | 0.078             | 1.11(0.98, 1.25) | 0.089             |
| <b>Ever been pregnant</b>                 |                                |                                    |                  |                   |                  |                   |                  |                   |
| No                                        | 28811                          | 348                                | Reference        |                   | Reference        |                   | Reference        |                   |
| Yes                                       | 161763                         | 2274                               | 1.02(0.91, 1.14) | 0.755             | 1.01(0.90, 1.13) | 0.886             | 0.99(0.89, 1.12) | 0.924             |
| <b>Menopause</b>                          |                                |                                    |                  |                   |                  |                   |                  |                   |
| No                                        | 59781                          | 463                                | Reference        |                   | Reference        |                   | Reference        |                   |
| Yes                                       | 130793                         | 2159                               | 1.09(0.94, 1.26) | 0.236             | 1.08(0.93, 1.24) | 0.316             | 1.00(0.86, 1.16) | 0.983             |
| <b>History of hysterectomy</b>            |                                |                                    |                  |                   |                  |                   |                  |                   |
| No                                        | 176087                         | 2259                               | Reference        |                   | Reference        |                   | Reference        |                   |
| Yes                                       | 14487                          | 363                                | 1.52(1.36, 1.71) | <b>&lt; 0.001</b> | 1.42(1.27, 1.59) | <b>&lt; 0.001</b> | 1.53(1.33, 1.75) | <b>&lt; 0.001</b> |
| <b>History of oophorectomy</b>            |                                |                                    |                  |                   |                  |                   |                  |                   |
| No                                        | 183127                         | 2474                               | Reference        |                   | Reference        |                   | Reference        |                   |
| Yes                                       | 7447                           | 148                                | 1.18(1.00, 1.39) | 0.054             | 1.09(0.93, 1.29) | 0.292             | 0.71(0.58, 0.87) | <b>&lt; 0.001</b> |
| <b>Ever used oral contraceptive pills</b> |                                |                                    |                  |                   |                  |                   |                  |                   |
| No                                        | 34290                          | 594                                | Reference        |                   | Reference        |                   | Reference        |                   |
| Yes                                       | 156284                         | 2028                               | 0.95(0.86, 1.04) | 0.272             | 1.01(0.92, 1.12) | 0.786             | 0.97(0.88, 1.07) | 0.533             |

| <b>Ever used HRT</b> |        |      |                  |                |                 |                |                                 |
|----------------------|--------|------|------------------|----------------|-----------------|----------------|---------------------------------|
| No                   | 126232 | 1351 | Reference        |                | Reference       |                | Reference                       |
| Yes                  | 64342  | 1271 | 1.38(1.27, 1.50) | < <b>0.001</b> | 1.4(1.28, 1.52) | < <b>0.001</b> | 1.36(1.25, 1.48) < <b>0.001</b> |

Model 1: adjusted for age.

Model 2: Adjusted for age, Townsend deprivation index, ethnicity, smoking status, alcohol drinker status, body mass index, physical activity, vitamin D supplement, fracture history, diabetes, systolic blood pressure, diastolic blood pressure.

Model 3: Adjusted for age, Townsend deprivation index, ethnicity, smoking status, alcohol use, body mass index, physical activity, vitamin D supplement, fracture history, diabetes, systolic blood pressure, diastolic blood pressure, age at menarche, pregnant, menopause, history of hysterectomy, history of oophorectomy, contraceptive pill use, HRT use.

HR: Hazard ratio; CI: Confidence interval; HRT: Hormone replacement therapy.

**Supplementary Table 3 Associations between hormonal and reproductive factors and the risk of rheumatoid arthritis after excluding those who were diagnosed with rheumatoid arthritis for two years.**

| Characteristics                | Total population<br>(n=223054) | Number Incidence cases<br>(n=2841) | Model 1          |                   | Model 2          |                  |
|--------------------------------|--------------------------------|------------------------------------|------------------|-------------------|------------------|------------------|
|                                |                                |                                    | HR (95%CI)       | P Value           | HR (95%CI)       | P Value          |
| <b>Age at menarche, years</b>  |                                |                                    |                  |                   |                  |                  |
| <12                            | 43039                          | 619                                | 1.18(1.05, 1.31) | <b>0.004</b>      | 1.08(0.96, 1.20) | 0.198            |
| 12                             | 41211                          | 486                                | 0.97(0.87, 1.10) | 0.666             | 0.95(0.84, 1.07) | 0.385            |
| 13                             | 53487                          | 640                                | Reference        |                   | Reference        |                  |
| 14                             | 42980                          | 515                                | 0.97(0.87, 1.09) | 0.643             | 0.97(0.86, 1.09) | 0.588            |
| >14                            | 36341                          | 505                                | 1.14(1.02, 1.28) | <b>0.026</b>      | 1.11(0.98, 1.24) | 0.094            |
| <b>Ever been pregnant</b>      |                                |                                    |                  |                   |                  |                  |
| No                             | 33150                          | 363                                | Reference        |                   | Reference        |                  |
| Yes                            | 189061                         | 2469                               | 1.04(0.93, 1.16) | 0.493             | 1.02(0.91, 1.14) | 0.715            |
| <b>Number of children</b>      |                                |                                    |                  |                   |                  |                  |
| None                           | 42358                          | 464                                | 1.06(0.95, 1.18) | 0.334             | 1.01(0.91, 1.13) | 0.832            |
| 1                              | 29738                          | 385                                | 1.16(1.03, 1.30) | 0.012             | 1.08(0.96, 1.21) | 0.188            |
| 2                              | 97959                          | 1197                               | Reference        |                   | Reference        |                  |
| 3                              | 39164                          | 529                                | 1.07(0.96, 1.18) | 0.221             | 1.01(0.91, 1.12) | 0.880            |
| ≥4                             | 13690                          | 264                                | 1.47(1.29, 1.69) | <b>&lt; 0.001</b> | 1.20(1.04, 1.37) | <b>0.010</b>     |
| Each child                     | 222909                         | 2839                               | 1.04(1.01, 1.08) | <b>0.006</b>      | 1.02(0.99, 1.05) | 0.272            |
| <b>Menopause</b>               |                                |                                    |                  |                   |                  |                  |
| No                             | 62239                          | 408                                | Reference        |                   | Reference        |                  |
| Yes                            | 160593                         | 2429                               | 1.25(1.08, 1.44) | <b>0.002</b>      | 1.20(1.04, 1.39) | <b>0.010</b>     |
| <b>Age at menopause, years</b> |                                |                                    |                  |                   |                  |                  |
| <45                            | 16305                          | 330                                | 1.65(1.42, 1.91) | <b>&lt;0.001</b>  | 1.48(1.28, 1.72) | <b>&lt;0.001</b> |

|                                                           |        |      |                  |         |                  |         |
|-----------------------------------------------------------|--------|------|------------------|---------|------------------|---------|
| 45-49                                                     | 30319  | 409  | 1.11(0.96, 1.28) | 0.146   | 1.06(0.92, 1.22) | 0.434   |
| 50-51                                                     | 29507  | 375  | Reference        |         | Reference        |         |
| 52-54                                                     | 31378  | 382  | 0.94(0.82, 1.09) | 0.408   | 0.95(0.83, 1.10) | 0.501   |
| >54                                                       | 19365  | 284  | 1.04(0.89, 1.21) | 0.623   | 1.03(0.88, 1.20) | 0.712   |
| <b>Reproductive years, years</b>                          |        |      |                  |         |                  |         |
| <33                                                       | 21999  | 416  | 1.44(1.25, 1.67) | < 0.001 | 1.31(1.13, 1.52) | < 0.001 |
| 33-35                                                     | 18916  | 251  | 1.02(0.87, 1.21) | 0.799   | 0.98(0.83, 1.16) | 0.806   |
| 36-37                                                     | 21078  | 252  | 0.90(0.76, 1.06) | 0.198   | 0.89(0.76, 1.05) | 0.176   |
| 38-39                                                     | 23474  | 316  | Reference        |         | Reference        |         |
| 40-42                                                     | 25267  | 319  | 0.91(0.78, 1.06) | 0.233   | 0.91(0.78, 1.07) | 0.255   |
| >42                                                       | 13615  | 198  | 0.98(0.82, 1.18) | 0.864   | 0.96(0.80, 1.15) | 0.660   |
| <b>History of hysterectomy</b>                            |        |      |                  |         |                  |         |
| No                                                        | 182456 | 2009 | Reference        |         | Reference        |         |
| Yes                                                       | 15834  | 334  | 1.47(1.30, 1.65) | < 0.001 | 1.37(1.21, 1.54) | <0.001  |
| <b>History of oophorectomy</b>                            |        |      |                  |         |                  |         |
| No                                                        | 202871 | 2453 | Reference        |         | Reference        |         |
| Yes                                                       | 17316  | 313  | 1.28(1.14, 1.44) | < 0.001 | 1.21(1.07, 1.36) | 0.002   |
| <b>Ever used oral contraceptive pills</b>                 |        |      |                  |         |                  |         |
| No                                                        | 40766  | 666  | Reference        |         | Reference        |         |
| Yes                                                       | 181781 | 2165 | 0.92(0.83, 1.01) | 0.066   | 0.97(0.88, 1.06) | 0.480   |
| <b>Duration of oral contraceptive pills use, per year</b> | 159331 | 1868 | 1.00(0.99, 1.01) | 0.812   | 1.00(0.99, 1.01) | 0.760   |
| <b>Ever used HRT</b>                                      |        |      |                  |         |                  |         |
| No                                                        | 138800 | 1321 | Reference        |         | Reference        |         |
| Yes                                                       | 83653  | 1508 | 1.44(1.33, 1.56) | < 0.001 | 1.43(1.32, 1.55) | < 0.001 |
| <b>Duration of HRT use, per year</b>                      | 61475  | 1070 | 1.02(1.01, 1.03) | 0.002   | 1.02(1.01, 1.03) | 0.002   |

Model 1: adjusted for age.

Model 2: Adjusted for age, Townsend deprivation index, ethnicity, smoking status, alcohol drinker status, body mass index, physical activity, vitamin D supplement, fracture history, diabetes, systolic blood pressure, diastolic blood pressure.

HR: Hazard ratio; CI: Confidence interval; HRT: Hormone replacement therapy.

**Supplementary Table 4 Associations between hormonal and reproductive factors and the risk of rheumatoid arthritis after excluding those who had hysterectomy or oophorectomy.**

| Characteristics                | Total population<br>(n=181627) | Number Incidence cases<br>(n=2326) | Model 1          |                   | Model 2          |              |
|--------------------------------|--------------------------------|------------------------------------|------------------|-------------------|------------------|--------------|
|                                |                                |                                    | HR (95%CI)       | P Value           | HR (95%CI)       | P Value      |
| <b>Age at menarche, years</b>  |                                |                                    |                  |                   |                  |              |
| <12                            | 33301                          | 467                                | 1.13(1.00, 1.28) | 0.053             | 1.04(0.92, 1.18) | 0.555        |
| 12                             | 33656                          | 400                                | 0.97(0.85, 1.10) | 0.611             | 0.94(0.83, 1.07) | 0.358        |
| 13                             | 44588                          | 542                                | Reference        |                   | Reference        |              |
| 14                             | 35550                          | 433                                | 0.97(0.86, 1.11) | 0.688             | 0.97(0.86, 1.10) | 0.640        |
| >14                            | 29571                          | 432                                | 1.19(1.05, 1.35) | <b>0.008</b>      | 1.15(1.02, 1.31) | <b>0.026</b> |
| <b>Ever been pregnant</b>      |                                |                                    |                  |                   |                  |              |
| No                             | 28560                          | 332                                | Reference        |                   | Reference        |              |
| Yes                            | 152370                         | 1987                               | 0.99(0.88, 1.11) | 0.822             | 0.98(0.87, 1.10) | 0.676        |
| <b>Number of children</b>      |                                |                                    |                  |                   |                  |              |
| None                           | 36693                          | 426                                | 1.12(1.00, 1.26) | 0.052             | 1.07(0.95, 1.20) | 0.267        |
| 1                              | 24874                          | 349                                | 1.27(1.12, 1.43) | <b>&lt; 0.001</b> | 1.17(1.04, 1.33) | <b>0.011</b> |
| 2                              | 78901                          | 956                                | Reference        |                   | Reference        |              |
| 3                              | 30708                          | 409                                | 1.06(0.94, 1.19) | 0.323             | 1.00(0.89, 1.13) | 0.952        |
| ≥4                             | 10345                          | 184                                | 1.37(1.17, 1.61) | <b>&lt; 0.001</b> | 1.12(0.95, 1.31) | 0.181        |
| Each child                     | 181521                         | 2324                               | 1.01(0.98, 1.05) | 0.550             | 0.99(0.96, 1.02) | 0.570        |
| <b>Menopause</b>               |                                |                                    |                  |                   |                  |              |
| No                             | 61755                          | 475                                | Reference        |                   | Reference        |              |
| Yes                            | 119710                         | 1849                               | 0.98(0.84, 1.14) | 0.806             | 0.97(0.84, 1.13) | 0.728        |
| <b>Age at menopause, years</b> |                                |                                    |                  |                   |                  |              |
| <45                            | 10193                          | 192                                | 1.37(1.16, 1.63) | <b>&lt;0.001</b>  | 1.25(1.05, 1.48) | <b>0.012</b> |

|                                                           |        |      |                  |                   |                  |                   |
|-----------------------------------------------------------|--------|------|------------------|-------------------|------------------|-------------------|
| 45-49                                                     | 26495  | 401  | 1.09(0.95, 1.26) | 0.201             | 1.04(0.91, 1.20) | 0.568             |
| 50-51                                                     | 27441  | 401  | Reference        |                   | Reference        |                   |
| 52-54                                                     | 29723  | 417  | 0.94(0.82, 1.08) | 0.387             | 0.95(0.83, 1.09) | 0.453             |
| >54                                                       | 18259  | 300  | 1.01(0.87, 1.17) | 0.931             | 1.00(0.86, 1.16) | 0.967             |
| <b>Reproductive years, years</b>                          |        |      |                  |                   |                  |                   |
| <33                                                       | 15099  | 279  | 1.31(1.11, 1.54) | <b>&lt; 0.001</b> | 1.2(1.03, 1.41)  | <b>0.023</b>      |
| 33-35                                                     | 16724  | 248  | 1.04(0.89, 1.23) | 0.606             | 1.00(0.85, 1.18) | 0.972             |
| 36-37                                                     | 19385  | 280  | 0.99(0.84, 1.16) | 0.871             | 0.98(0.84, 1.15) | 0.840             |
| 38-39                                                     | 21926  | 326  | Reference        |                   | Reference        |                   |
| 40-42                                                     | 23811  | 348  | 0.95(0.82, 1.11) | 0.534             | 0.96(0.82, 1.11) | 0.578             |
| >42                                                       | 12481  | 204  | 0.97(0.81, 1.16) | 0.726             | 0.95(0.79, 1.13) | 0.543             |
| <b>Ever used oral contraceptive pills</b>                 |        |      |                  |                   |                  |                   |
| No                                                        | 31582  | 511  | Reference        |                   | Reference        |                   |
| Yes                                                       | 149683 | 1809 | 0.94(0.85, 1.05) | 0.272             | 1.01(0.91, 1.12) | 0.844             |
| <b>Duration of oral contraceptive pills use, per year</b> | 131171 | 1575 | 1.00(0.99, 1.01) | 0.735             | 1.00(1.00, 1.01) | 0.441             |
| <b>Ever used HRT</b>                                      |        |      |                  |                   |                  |                   |
| No                                                        | 125824 | 1300 | Reference        |                   | Reference        |                   |
| Yes                                                       | 55351  | 1017 | 1.31(1.20, 1.44) | <b>&lt; 0.001</b> | 1.34(1.22, 1.46) | <b>&lt; 0.001</b> |
| <b>Duration of HRT use, per year</b>                      | 41702  | 757  | 1.03(1.01, 1.04) | <b>0.002</b>      | 1.03(1.01, 1.04) | <b>&lt; 0.001</b> |

Model 1: adjusted for age.

Model 2: Adjusted for age, Townsend deprivation index, ethnicity, smoking status, alcohol drinker status, body mass index, physical activity, vitamin D supplement, fracture history, diabetes, systolic blood pressure, diastolic blood pressure.

HR: Hazard ratio; CI: Confidence interval; HRT: Hormone replacement therapy.



**Supplementary Table 5 Associations between hormonal and reproductive factors and the risk of rheumatoid arthritis after counting missing data using MICE.**

| Characteristics                | Total population<br>(n=270460) | Number Incidence cases<br>(n=4329) | Model 1          |                | Model 2          |                |
|--------------------------------|--------------------------------|------------------------------------|------------------|----------------|------------------|----------------|
|                                |                                |                                    | HR (95%)         | P Value        | HR (95%CI)       | P Value        |
| <b>Age at menarche, years</b>  |                                |                                    |                  |                |                  |                |
| <12                            | 52549                          | 959                                | 1.22(1.13, 1.31) | < <b>0.001</b> | 1.10(1.01, 1.20) | <b>0.032</b>   |
| 12                             | 49731                          | 724                                | 0.98(0.89, 1.08) | 0.744          | 0.96(0.86, 1.05) | 0.369          |
| 13                             | 64015                          | 936                                | Reference        |                | Reference        |                |
| 14                             | 51747                          | 787                                | 1.01(0.99, 1.04) | 0.797          | 0.99(0.90, 1.09) | 0.893          |
| >14                            | 44211                          | 786                                | 1.04(1.10, 1.29) | < <b>0.001</b> | 1.15(1.15, 1.16) | <b>0.004</b>   |
| <b>Ever been pregnant</b>      |                                |                                    |                  |                |                  |                |
| No                             | 39909                          | 561                                | Reference        |                | Reference        |                |
| Yes                            | 229427                         | 3756                               | 1.03(0.94, 1.12) | 0.540          | 1.01(0.92, 1.10) | 0.872          |
| <b>Number of children</b>      |                                |                                    |                  |                |                  |                |
| None                           | 50722                          | 704                                | 1.05(0.96, 1.14) | 0.279          | 1.00(0.91, 1.09) | 0.945          |
| 1                              | 36124                          | 590                                | 1.16(1.07, 1.25) | <b>0.002</b>   | 1.07(0.98, 1.17) | 0.144          |
| 2                              | 118178                         | 1813                               | Reference        |                | Reference        |                |
| 3                              | 47878                          | 821                                | 1.08(1.00, 1.16) | 0.066          | 1.01(0.93, 1.10) | 0.757          |
| ≥4                             | 17309                          | 396                                | 1.40(1.29, 1.51) | < <b>0.001</b> | 1.10(0.99, 1.22) | 0.081          |
| Each child                     | 270211                         | 4324                               | 1.04(1.02, 1.07) | < <b>0.001</b> | 1.01(0.99, 1.04) | 0.375          |
| <b>Menopause</b>               |                                |                                    |                  |                |                  |                |
| No                             | 73914                          | 619                                | Reference        |                | Reference        |                |
| Yes                            | 196121                         | 3701                               | 1.31(1.19, 1.42) | < <b>0.001</b> | 1.25(1.14, 1.37) | < <b>0.001</b> |
| <b>Age at menopause, years</b> |                                |                                    |                  |                |                  |                |
| <45                            | 20218                          | 523                                | 1.70(1.58, 1.82) | < <b>0.001</b> | 1.52(1.40, 1.64) | < <b>0.001</b> |

|                                                          |        |      |                  |                   |                  |                   |
|----------------------------------------------------------|--------|------|------------------|-------------------|------------------|-------------------|
| 45-49                                                    | 36774  | 633  | 1.14(1.02, 1.25) | <b>0.027</b>      | 1.08(0.97, 1.19) | 0.182             |
| 50-51                                                    | 35538  | 560  | Reference        |                   | Reference        |                   |
| 52-54                                                    | 37550  | 563  | 0.94(0.82, 1.05) | 0.269             | 0.95(0.83, 1.06) | 0.363             |
| >54                                                      | 23069  | 396  | 0.99(0.86, 1.12) | 0.907             | 0.98(0.85, 1.11) | 0.787             |
| <b>Reproductive years, years</b>                         |        |      |                  |                   |                  |                   |
| <33                                                      | 27127  | 663  | 1.59(1.47, 1.71) | <b>&lt; 0.001</b> | 1.43(1.31, 1.55) | <b>&lt; 0.001</b> |
| 33-35                                                    | 22851  | 385  | 1.10(0.96, 1.24) | 0.174             | 1.05(0.91, 1.19) | 0.490             |
| 36-37                                                    | 25346  | 377  | 0.95(0.81, 1.08) | 0.441             | 0.94(0.81, 1.08) | 0.404             |
| 38-39                                                    | 28194  | 447  | Reference        |                   | Reference        |                   |
| 40-42                                                    | 30065  | 471  | 0.96(0.83, 1.09) | 0.564             | 0.96(0.83, 1.09) | 0.562             |
| >42                                                      | 16262  | 280  | 1.00(0.85, 1.15) | 0.991             | 0.97(0.82, 1.12) | 0.671             |
| <b>History of hysterectomy</b>                           |        |      |                  |                   |                  |                   |
| No                                                       | 219586 | 3026 | Reference        |                   | Reference        |                   |
| Yes                                                      | 19653  | 520  | 1.51(1.42, 1.61) | <b>&lt; 0.001</b> | 1.40(1.30, 1.49) | <b>&lt; 0.001</b> |
| <b>History of oophorectomy</b>                           |        |      |                  |                   |                  |                   |
| No                                                       | 244974 | 3699 | Reference        |                   | Reference        |                   |
| Yes                                                      | 21537  | 505  | 1.35(1.30, 1.41) | <b>&lt; 0.001</b> | 1.26(1.17, 1.36) | <b>&lt; 0.001</b> |
| <b>Ever used oral contraceptive pills</b>                |        |      |                  |                   |                  |                   |
| No                                                       | 50978  | 1037 | Reference        |                   | Reference        |                   |
| Yes                                                      | 218651 | 3278 | 0.91(0.84, 0.99) | <b>0.016</b>      | 0.98(0.90, 1.05) | 0.527             |
| <b>Duration of Oral contraceptive pill use, per year</b> | 189203 | 2764 | 1.00(0.99, 1.00) | 0.178             | 1.00(0.99, 1.00) | 0.641             |
| <b>Ever used HRT</b>                                     |        |      |                  |                   |                  |                   |
| No                                                       | 166759 | 2003 | Reference        |                   | Reference        |                   |
| Yes                                                      | 102717 | 2303 | 1.44(1.38, 1.51) | <b>&lt; 0.001</b> | 1.45(1.38, 1.51) | <b>&lt; 0.001</b> |
| <b>Duration of HRT use, per year</b>                     | 74154  | 1604 | 1.01(1.00, 1.02) | <b>0.004</b>      | 1.01(1.00, 1.02) | <b>0.004</b>      |

Model 1: adjusted for age.

Model 2: Adjusted for age, Townsend deprivation index, ethnicity, smoking status, alcohol drinker status, body mass index, physical activity, vitamin D supplement, fracture history, diabetes, systolic blood pressure, diastolic blood pressure.

HR: Hazard ratio; CI: Confidence interval; HRT: Hormone replacement therapy.

**Supplementary Table 6 Adjusted hazard ratios for rheumatoid arthritis associated with hormonal and reproductive factors, by age, Townsend deprivation index, and BMI.**

| Characteristics                                           | Age              |                  |                   | Townsend deprivation index |                  |                   | BMI                    |                        |              |
|-----------------------------------------------------------|------------------|------------------|-------------------|----------------------------|------------------|-------------------|------------------------|------------------------|--------------|
|                                                           | ≤ 60 years       | > 60 years       | <i>P</i>          | Below average              | Above average    | <i>P</i>          | ≤ 25 kg/m <sup>2</sup> | > 25 kg/m <sup>2</sup> | <i>P</i>     |
|                                                           | HR (95%CI)       | HR (95%CI)       | Value             | HR (95%CI)                 | HR (95%CI)       | Value             | HR (95%CI)             | HR (95%CI)             | Value        |
| <b>Early menarche<sup>a</sup> vs. not</b>                 | 1.13(1.00, 1.27) | 1.01(0.90, 1.14) | 0.071             | 1.06(0.95, 1.19)           | 1.07(0.95, 1.21) | 0.690             | 1.12(0.95, 1.33)       | 1.05(0.95, 1.16)       | 0.793        |
| <b>Pregnant vs. not</b>                                   | 1.16(1.00, 1.33) | 0.93(0.80, 1.08) | <b>0.031</b>      | 0.89(0.77, 1.02)           | 1.24(1.06, 1.44) | <b>&lt; 0.001</b> | 0.98(0.83, 1.17)       | 1.09(0.96, 1.24)       | 0.082        |
| <b>Each child</b>                                         | 1.06(0.92, 1.24) | 1.14(0.98, 1.33) | <b>0.011</b>      | 0.96(0.92, 1.00)           | 1.06(1.03, 1.10) | <b>0.006</b>      | 0.98(0.93, 1.04)       | 1.04(1.00, 1.07)       | <b>0.025</b> |
| <b>Early menopause<sup>b</sup> vs. not</b>                | 1.48(1.23, 1.78) | 1.43(1.24, 1.65) | 0.675             | 1.27(1.09, 1.50)           | 1.66(1.42, 1.93) | <b>&lt;0.001</b>  | 1.40(1.13, 1.72)       | 1.48(1.30, 1.69)       | 0.084        |
| <b>Hysterectomy vs. not</b>                               | 1.63(1.34, 1.98) | 1.32(1.16, 1.50) | <b>0.005</b>      | 1.36(1.17, 1.58)           | 1.45(1.23, 1.70) | 0.379             | 1.49(1.21, 1.82)       | 1.37(1.21, 1.56)       | 0.457        |
| <b>Oophorectomy vs. not</b>                               | 1.32(1.11, 1.57) | 1.14(0.99, 1.31) | <b>0.007</b>      | 1.15(0.99, 1.34)           | 1.27(1.08, 1.48) | 0.257             | 1.38(1.13, 1.69)       | 1.14(1.00, 1.30)       | 0.063        |
| <b>Oral contraceptive pill use vs. not</b>                | 1.07(0.91, 1.25) | 0.95(0.86, 1.06) | 0.423             | 0.98(0.87, 1.10)           | 1.00(0.88, 1.13) | 0.168             | 0.97(0.83, 1.13)       | 0.99(0.90, 1.10)       | 0.350        |
| <b>Duration of oral contraceptive pill use (per year)</b> | 0.99(0.99, 1.00) | 1.01(1.00, 1.02) | <b>&lt; 0.001</b> | 1.00(0.99, 1.01)           | 1.00(0.99, 1.01) | 0.634             | 1.00(0.99, 1.01)       | 1.00(0.99, 1.01)       | 0.463        |
| <b>HRT use vs. not</b>                                    | 1.51(1.35, 1.69) | 1.42(1.28, 1.57) | 0.055             | 1.37(1.24, 1.51)           | 1.57(1.41, 1.76) | 0.323             | 1.42(1.24, 1.62)       | 1.47(1.35, 1.61)       | 0.157        |
| <b>Duration of HRT use (per year)</b>                     | 1.03(1.01, 1.05) | 1.02(1.00, 1.03) | 0.446             | 1.02(1.00, 1.03)           | 1.02(1.01, 1.03) | 0.361             | 1.03(1.01, 1.05)       | 1.01(1.00, 1.02)       | <b>0.019</b> |

Adjusted for age, Townsend deprivation index, ethnicity, smoking status, alcohol drinker status, body mass index, physical activity, vitamin D supplement, fracture history, diabetes, systolic blood pressure, diastolic blood pressure.

HR: Hazard ratio; CI: Confidence interval; HRT: Hormone replacement therapy; BMI: body mass index.

<sup>a</sup> Early menarche was defined as age at first menstrual period before the age of 12 years.

<sup>b</sup> Early menopause was defined as the permanent absence of menstrual periods before the age of 45 years.
